# Supplementary material
Source: publisher site journal article supplement (https://www.dovepress.com/article/481724)
Supplement: Supplementary file 1 [file get_supplementary_file.php]

**Statin Monotherapy not Inferior to Aspirin or Combined Aspirin and Statins Reducing the Incidences of Cirrhosis, HCC, and Mortality in MAFLD/MASH Patients: A Population Cohort Study**

**Table S1. Definitions of comorbidities and excluded diseases**

| **Comorbidities** | **ICD-9-CM** | **ICD-10-CM** |
| --- | --- | --- |
| MAFLD/MASH | 571.8, 571.9 | K75.81, K76.0 |
| Liver Cirrhosis | 571.2, 571.5, 571.6 | K70.2, K70.30, K70.31, K74.1, K74.2, K74.3, K74.4, K74.5, K74.6 |
| Hepatocellular Carcinoma | 155.0 | C22.0 |
| Cardiovascular disease (CVD) | 401-405, 410-414, 425, 427, 428, 429.3, 444, 451 | I10, I11, I12, I13, I15, I20-I25, I42, I43, I46.2, I46.8, I46.9, I47, I48, I49, I50, I51.7, I74, I80, N26.2, R00.1 |
| Cerebrovascular accident (CVA) | 430-438 | I60-I69 |
| Diabetes mellitus (DM) | 250 | E08-E13 |
| Hyperlipidemia | 272 | E71.30, E75.21, E75.22, E75.24, E75.3, E75.5, E75.6, E77, E78.0, E78.1, E78.2, E78.3, E78.4, E78.5, E78.6, E78.70, E78.79, E78.8, E78.9 |
| Obesity | 278, 783.1 | E66.09, E66.1, E66.8, E66.9, E66.01, E66.2, E65, E67.0, E67.1, E67.3, E67.2, E67.8, E68 R63.5 |
| Chronic kidney disease | 585 | N18.4, N18.5, N18.6, N18.9 |
| Metabolic syndrome (MSD) | Over three kinds of CVD, CVA, DM, Hyperlipidemia, Obesity | |
| Viral hepatitis | 070 | B15-B19 |
| Alcoholism | 291, 303, 305.0, 571.0-571.3, 790.3, V11.3, V79.1 | F10, K70, R78.0, Z65.8 |
| **Excluded diseases** | **ICD9** | **ICD10** |
| Wilson’s disease | 275.1 | E83.0 |
| Hemochromatosis | 275.0 | E83.1 |
| Alpha1-antitrypsin deficiency | 273.8, 273.9, 277.6, 289.8 | E88.0 |
| Liver transplant | V42.7 | Z94.4 |
| All cancer | 140-208 | C00-C99 |

**Table S2. Definitions of medications**

| **Medication** | **ATC code** |
| --- | --- |
| Aspirin | B01AC06, B01AC30 |
| Statin | C10AA01, C10AA02, C10AA03, C10AA04, C10AA05, C10AA07, C10BA01, C10BA02, C10BA03, C10BX03 |
| Metformin | A10BA02, A10BD |
| Gemfibrozil, fenofibrate | C10AB04, C10AB05 |
| APA | B01AC04, B01AC07, B01AC11, B01AC17, B01AC22, B01AC23, B01AC24 |
| H2 receptor antagonists | A02BA |
| Proton pump inhibitors | A02BC |

APA: non-aspirin antiplatelet agents

Table S3. Incidence rates and hazard ratios of cirrhosis comparing statin alone, aspirin alone, and combined statin and aspirin usage

| Variables | Cirrhotic | | | cHR | (95% CI) | *p*-value | aHR | (95% CI) | *p*-value |
| --- | --- | --- | --- | --- | --- | --- | --- | --- | --- |
| Event | PY | IR |
| **Exposure** |  |  |  |  |  |  |  |  |  |
| Statin&Aspirin | 4 | 10630 | 0.38 | 1.00 | (reference) | - | 1.00 | (reference) | - |
| Statin | 5 | 9888 | 0.51 | 1.27 | (0.34, 4.85) | 0.72 | 1.37 | (0.35, 5.30) | 0.65 |
| Aspirin | 3 | 5186 | 0.58 | 1.50 | (0.33, 6.68) | 0.60 | 1.52 | (0.34, 6.90) | 0.59 |
| Non-Statin&Aspirin | 46 | 20708 | 2.22 | 5.75 | (2.07, 15.98) | <0.001 | 6.07 | (2.18, 16.93) | <0.001 |

**Notes:** Adjusted HR: Adjusted for sex, age, comorbidities, and medications in the Cox proportional hazards model

**Abbreviations:** HR, hazard ratio; CI, confidence interval; PY, person-years; IR, incidence rate per 1000 person-years.

Table S4. Incidence rates and hazard ratios of HCC comparing statin alone, aspirin alone, and combined statin and aspirin usage

| Variables | HCC | | | cHR | (95% CI) | *p*-value | aHR | (95% CI) | *p*-value |
| --- | --- | --- | --- | --- | --- | --- | --- | --- | --- |
| Event | PY | IR |
| **Exposure** |  |  |  |  |  |  |  |  |  |
| Statin&Aspirin | 297 | 10173 | 29.19 | 1.00 | (reference) | - | 1.00 | (reference) | - |
| Statin | 169 | 9577 | 17.65 | 0.59 | (0.49, 0.71) | <0.001 | 0.83 | (0.69, 1.01) | 0.07 |
| Aspirin | 236 | 4810 | 49.06 | 1.71 | (1.44, 2.03) | <0.001 | 1.39 | (1.16, 1.65) | <0.001 |
| Non-Statin&Aspirin | 854 | 19663 | 43.43 | 1.51 | (1.32, 1.72) | <0.001 | 1.65 | (1.45, 1.89) | <0.001 |

**Notes:** Adjusted HR: Adjusted for sex, age, comorbidities, and medications in the Cox proportional hazards model

**Abbreviations:** HR, hazard ratio; CI, confidence interval; PY, person-years; IR, incidence rate per 1000 person-years.

Table S5. Incidence rates and hazard ratios of death comparing statin alone, aspirin alone, and combined statin and aspirin usage

| Variables | Death | | | cHR | (95% CI) | *p*-value | aHR | (95% CI) | *p*-value |
| --- | --- | --- | --- | --- | --- | --- | --- | --- | --- |
| Event | PY | IR |
| **Exposure** |  |  |  |  |  |  |  |  |  |
| Statin&Aspirin | 571 | 10645 | 53.64 | 1.00 | (reference) | - | 1.00 | (reference) | - |
| Statin | 324 | 9892 | 32.75 | 0.60 | (0.52, 0.69) | <0.001 | 0.77 | (0.67, 0.89) | <0.001 |
| Aspirin | 486 | 5190 | 93.64 | 1.77 | (1.57, 2.00) | <0.001 | 1.63 | (1.44, 1.84) | <0.001 |
| Non-Statin&Aspirin | 1922 | 20803 | 92.39 | 1.75 | (1.59, 1.92) | <0.001 | 1.90 | (1.72, 2.08) | <0.001 |

**Notes:** Adjusted HR: Adjusted for sex, age, comorbidities, and medications in the Cox proportional hazards model

**Abbreviations:** HR, hazard ratio; CI, confidence interval; PY, person-years; IR, incidence rate per 1000 person-years.

| Table S6. Baseline characteristics of patients with MAFLD/MASH in non-statin&aspirin, statin, aspirin, and statin&aspirin cohort (only matched index year). | | | | | | | | | |  |
| --- | --- | --- | --- | --- | --- | --- | --- | --- | --- | --- |
| Variables | Non-Statin&Aspirin | | Statin | | Aspirin | | Statin&Aspirin | | *p*-value | SMD |
| (n=7905) | | (n=1772) | | (n=1453) | | (n=4680) | |
| n | % | n | % | n | % | n | % |
| **Gender** |  |  |  |  |  |  |  |  |  |  |
| Female | 3190 | 40.35 | 845 | 47.69 | 546 | 37.58 | 1850 | 39.53 | <0.0001 | 0.148 |
| Male | 4715 | 59.65 | 927 | 52.31 | 907 | 62.42 | 2830 | 60.47 |  |  |
| **Age, years** |  |  |  |  |  |  |  |  |  |  |
| 18-50 | 2304 | 29.15 | 398 | 22.46 | 101 | 6.95 | 339 | 7.24 | <0.0001 | 0.153 |
| 51-60 | 2363 | 29.89 | 622 | 35.1 | 250 | 17.21 | 966 | 20.64 |  | 0.111 |
| >60 | 3238 | 40.96 | 752 | 42.44 | 1102 | 75.84 | 3375 | 72.12 |  | 0.03 |
| **Comorbidities** |  |  |  |  |  |  |  |  |  |  |
| Cardiovascular disease | 3272 | 41.39 | 1027 | 57.96 | 1314 | 90.43 | 4171 | 89.12 | <0.0001 | 0.336 |
| Stroke | 391 | 4.95 | 89 | 5.02 | 411 | 28.29 | 1239 | 26.47 | <0.0001 | 0.004 |
| Diabetes mellitus | 1679 | 21.24 | 795 | 44.86 | 575 | 39.57 | 2791 | 59.64 | <0.0001 | 0.519 |
| Hyperlipidemia | 2214 | 28.01 | 1182 | 66.7 | 557 | 38.33 | 3813 | 81.47 | <0.0001 | 0.841 |
| Obesity | 176 | 2.23 | 43 | 2.43 | 27 | 1.86 | 158 | 3.38 | <0.0001 | 0.013 |
| Chronic kidney disease | 257 | 3.25 | 65 | 3.67 | 125 | 8.6 | 517 | 11.05 | <0.0001 | 0.023 |
| Viral hepatitis | 2308 | 29.2 | 357 | 20.15 | 435 | 29.94 | 865 | 18.48 | <0.0001 | 0.211 |
| Metabolic syndrome | 707 | 8.94 | 400 | 22.57 | 475 | 32.69 | 2798 | 59.79 | <0.0001 | 0.381 |
| **Medication** |  |  |  |  |  |  |  |  |  |  |
| H2 receptor antagonists | 3568 | 45.14 | 699 | 39.45 | 849 | 58.43 | 2748 | 58.72 | <0.0001 | 0.115 |
| Proton pump inhibitors | 2179 | 27.56 | 373 | 21.05 | 502 | 34.55 | 1621 | 34.64 | <0.0001 | 0.152 |
|  | mean | ± SDa | mean | ± SDa | mean | ± SDa | mean | ± SDa |  |  |
| **Age, years** | 57.91 | 13.17 | 58.52 | 11.01 | 68.62 | 11.6 | 66.53 | 10.7 | <0.0001 | 0.05 |
| **Follow-up time, years,** | mean | ± SDa | mean | ± SDa | mean | ± SDa | mean | ± SDa |  |  |
| Hepatocellular carcinoma | 4.24 | 2.75 | 6.24 | 3.18 | 4.03 | 2.66 | 4.62 | 2.80 | <0.0001 | 0.67 |
| Cirrhosis | 4.45 | 2.76 | 6.39 | 3.14 | 4.28 | 2.66 | 4.78 | 2.79 | <0.0001 | 0.658 |
| All-cause mortality | 4.48 | 2.76 | 6.41 | 3.14 | 4.29 | 2.66 | 4.78 | 2.79 | <0.0001 | 0.654 |

at-test; Chi-square test; SD: standard deviation.

Table S7. Incidences and hazard ratios of cirrhotic Outcomes. (Statin&Aspirin) (only matched index year)

| Variables | Cirrhotic | | | cHR | (95% CI) | *p*-value | aHR | (95% CI) | *p*-value |
| --- | --- | --- | --- | --- | --- | --- | --- | --- | --- |
| Event | PY | IR |
| **Exposure** |  |  |  |  |  |  |  |  |  |
| Non-Statin&Aspirin | 89 | 35159 | 2.53 | 1.00 | (reference) | - | 1.00 | (reference) | - |
| Statin | 9 | 11331 | 0.79 | 0.31 | (0.15, 0.63) | 0.001 | 0.35 | (0.17, 0.73) | 0.005 |
| Aspirin | 4 | 6224 | 0.64 | 0.25 | (0.09, 0.69) | 0.01 | 0.23 | (0.08, 0.65) | 0.01 |
| Statin&Aspirin | 8 | 22348 | 0.36 | 0.14 | (0.07, 0.30) | <0.001 | 0.13 | (0.06, 0.29) | <0.001 |
| **Gender** |  |  |  |  |  |  |  |  |  |
| Female | 33 | 31687 | 1.04 | 1.00 | (reference) | - | 1.00 | (reference) | - |
| Male | 77 | 43374 | 1.78 | 1.69 | (1.12, 2.54) | 0.01 | 1.62 | (1.07, 2.44) | 0.02 |
| **Age, years** |  |  |  |  |  |  |  |  |  |
| 18-50 | 37 | 16769 | 2.21 | 1.00 | (reference) | - | 1.00 | (reference) | - |
| 51-60 | 30 | 21716 | 1.38 | 0.62 | (0.38, 1.01) | 0.05 | 0.66 | (0.40, 1.08) | 0.10 |
| >60 | 43 | 36576 | 1.18 | 0.51 | (0.33, 0.80) | 0.00 | 0.56 | (0.34, 0.92) | 0.02 |
| **Comorbidities** |  |  |  |  |  |  |  |  |  |
| Cardiovascular disease | |  |  |  |  |  |  |  |  |
| No | 60 | 30761 | 1.95 | 1.00 | (reference) | - | 1.00 | (reference) | - |
| Yes | 50 | 44300 | 1.13 | 0.57 | (0.39, 0.83) | 0.003 | 0.60 | (0.38, 0.96) | 0.03 |
| Stroke |  |  |  |  |  |  |  |  |  |
| No | 102 | 66576 | 1.53 | 1.00 | (reference) | - | 1.00 | (reference) | - |
| Yes | 8 | 8485 | 0.94 | 0.60 | (0.29, 1.22) | 0.16 | 0.58 | (0.26, 1.30) | 0.19 |
| Diabetes mellitus |  |  |  |  |  |  |  |  |  |
| No | 65 | 48775 | 1.33 | 1.00 | (reference) | - | 1.00 | (reference) | - |
| Yes | 45 | 26286 | 1.71 | 1.27 | (0.87, 1.86) | 0.21 | 1.80 | (1.13, 2.88) | 0.01 |
| Hyperlipidemia |  |  |  |  |  |  |  |  |  |
| No | 79 | 38346 | 2.06 | 1.00 | (reference) | - | 1.00 | (reference) | - |
| Yes | 31 | 36716 | 0.84 | 0.41 | (0.27, 0.62) | <0.001 | 0.32 | (0.18, 0.55) | <0.001 |
| Obesity |  |  |  |  |  |  |  |  |  |
| No |  |  | 1.49 | 1.00 | (reference) | - | 1.00 | (reference) | - |
| Yes |  |  | 0.58 | 0.38 | (0.05, 2.72) | 0.34 | 0.31 | (0.04, 2.30) | 0.25 |
| Chronic kidney disease | |  |  |  |  |  |  |  |  |
| No | 107 | 71554 | 1.50 | 1.00 | (reference) | - | 1.00 | (reference) | - |
| Yes | 3 | 3507 | 0.86 | 0.54 | (0.17, 1.70) | 0.29 | 0.48 | (0.14, 1.59) | 0.23 |
| Viral hepatitis |  |  |  |  |  |  |  |  |  |
| No | 70 | 56809 | 1.23 | 1.00 | (reference) | - | 1.00 | (reference) | - |
| Yes | 40 | 18252 | 2.19 | 1.77 | (1.20, 2.61) | 0.004 | 1.61 | (1.09, 2.39) | 0.02 |
| Metabolic syndrome | |  |  |  |  |  |  |  |  |
| No | 88 | 56700 | 1.55 | 1.00 | (reference) | - | 1.00 | (reference) | - |
| Yes | 22 | 18361 | 1.20 | 0.75 | (0.47, 1.20) | 0.23 | 2.02 | (0.91, 4.50) | 0.09 |
| **Medication** |  |  |  |  |  |  |  |  |  |
| H2 receptor antagonists | |  |  |  |  |  |  |  |  |
| No | 51 | 40770 | 1.25 | 1.00 | (reference) | - | 1.00 | (reference) | - |
| Yes | 59 | 34291 | 1.72 | 1.35 | (0.92, 1.97) | 0.12 | 1.23 | (0.82, 1.85) | 0.32 |
| Proton pump inhibitors | |  |  |  |  |  |  |  |  |
| No | 64 | 55420 | 1.15 | 1.00 | (reference) | - | 1.00 | (reference) | - |
| Yes | 46 | 19641 | 2.34 | 1.99 | (1.36, 2.92) | <0.001 | 2.07 | (1.37, 3.11) | <0.001 |

Table S8. Incidences and hazard ratios of HCC Outcomes. (Statin&Aspirin) (only matched index year)

| Variables | Hepatocellular carcinoma | | | cHR | (95% CI) | *p*-value | aHR | (95% CI) | *p*-value |
| --- | --- | --- | --- | --- | --- | --- | --- | --- | --- |
| Event | PY | IR |
| **Exposure** |  |  |  |  |  |  |  |  |  |
| Non-Statin&Aspirin | 1353 | 33552 | 40.33 | 1.00 | (reference) | - | 1.00 | (reference) | - |
| Statin | 192 | 11051 | 17.37 | 0.41 | (0.35, 0.48) | <0.001 | 0.47 | (0.40, 0.55) | <0.001 |
| Aspirin | 297 | 5858 | 50.70 | 1.27 | (1.12, 1.44) | <0.001 | 0.84 | (0.73, 0.96) | 0.01 |
| Statin&Aspirin | 602 | 21633 | 27.83 | 0.69 | (0.62, 0.76) | <0.001 | 0.57 | (0.50, 0.64) | <0.001 |
| **Gender** |  |  |  |  |  |  |  |  |  |
| Female | 816 | 30650 | 26.62 | 1.00 | (reference) | - | 1.00 | (reference) | - |
| Male | 1628 | 41443 | 39.28 | 1.49 | (1.37, 1.62) | <0.001 | 1.49 | (1.37, 1.62) | <0.001 |
| **Age, years** |  |  |  |  |  |  |  |  |  |
| 18-50 | 301 | 16452 | 18.30 | 1.00 | (reference) | - | 1.00 | (reference) | - |
| 51-60 | 587 | 20952 | 28.02 | 1.53 | (1.33, 1.76) | <0.001 | 1.51 | (1.31, 1.74) | <0.001 |
| >60 | 1556 | 34689 | 44.86 | 2.50 | (2.21, 2.83) | <0.001 | 2.37 | (2.08, 2.71) | <0.001 |
| **Comorbidities** |  |  |  |  |  |  |  |  |  |
| Cardiovascular disease | |  |  |  |  |  |  |  |  |
| No | 881 | 29610 | 29.75 | 1.00 | (reference) | - | 1.00 | (reference) | - |
| Yes | 1563 | 42484 | 36.79 | 1.26 | (1.16, 1.37) | <0.001 | 0.98 | (0.89, 1.08) | 0.71 |
| Stroke |  |  |  |  |  |  |  |  |  |
| No | 2105 | 63950 | 32.92 | 1.00 | (reference) | - | 1.00 | (reference) | - |
| Yes | 339 | 8143 | 41.63 | 1.29 | (1.15, 1.45) | <0.001 | 1.01 | (0.88, 1.15) | 0.91 |
| Diabetes mellitus |  |  |  |  |  |  |  |  |  |
| No | 1351 | 47017 | 28.73 | 1.00 | (reference) | - | 1.00 | (reference) | - |
| Yes | 1093 | 25077 | 43.59 | 1.53 | (1.41, 1.66) | <0.001 | 1.40 | (1.27, 1.54) | <0.001 |
| Hyperlipidemia |  |  |  |  |  |  |  |  |  |
| No | 1482 | 36378 | 40.74 | 1.00 | (reference) | - | 1.00 | (reference) | - |
| Yes | 962 | 35716 | 26.93 | 0.66 | (0.61, 0.72) | <0.001 | 0.55 | (0.50, 0.61) | <0.001 |
| Obesity |  |  |  |  |  |  |  |  |  |
| No | 2410 | 70403 | 34.23 | 1.00 | (reference) | - | 1.00 | (reference) | - |
| Yes | 34 | 1691 | 20.11 | 0.59 | (0.42, 0.83) | 0.00 | 0.67 | (0.48, 0.95) | 0.02 |
| Chronic kidney disease | |  |  |  |  |  |  |  |  |
| No | 2267 | 68752 | 32.97 | 1.00 | (reference) | - | 1.00 | (reference) | - |
| Yes | 177 | 3342 | 52.96 | 1.65 | (1.41, 1.92) | <0.001 | 1.14 | (0.97, 1.34) | 0.12 |
| Viral hepatitis |  |  |  |  |  |  |  |  |  |
| No | 1046 | 55776 | 18.75 | 1.00 | (reference) | - | 1.00 | (reference) | - |
| Yes | 1398 | 16318 | 85.67 | 4.66 | (4.30, 5.05) | <0.001 | 4.54 | (4.18, 4.92) | <0.001 |
| Metabolic syndrome | |  |  |  |  |  |  |  |  |
| No | 1751 | 54373 | 32.20 | 1.00 | (reference) | - | 1.00 | (reference) | - |
| Yes | 693 | 17720 | 39.11 | 1.24 | (1.13, 1.35) | <0.001 | 1.33 | (1.14, 1.56) | <0.001 |
| **Medication** |  |  |  |  |  |  |  |  |  |
| H2 receptor antagonists | |  |  |  |  |  |  |  |  |
| No | 1155 | 39261 | 29.42 | 1.00 | (reference) | - | 1.00 | (reference) | - |
| Yes | 1289 | 32832 | 39.26 | 1.37 | (1.26, 1.48) | <0.001 | 1.19 | (1.09, 1.29) | <0.001 |
| Proton pump inhibitors | |  |  |  |  |  |  |  |  |
| No | 1708 | 53248 | 32.08 | 1.00 | (reference) | - | 1.00 | (reference) | - |
| Yes | 736 | 18846 | 39.05 | 1.24 | (1.14, 1.36) | <0.001 | 1.09 | (1.00, 1.20) | 0.06 |

Table S9. Incidences and hazard ratios of overall mortality Outcomes. (Statin&Aspirin) (only matched index year)

| Variables | All-cause mortality | | | cHR | (95% CI) | *p*-value | aHR | (95% CI) | *p*-value |
| --- | --- | --- | --- | --- | --- | --- | --- | --- | --- |
| Event | PY | IR |
| **Exposure** |  |  |  |  |  |  |  |  |  |
| Non-Statin&Aspirin | 2969 | 35380 | 83.92 | 1.00 | (reference) | - | 1.00 | (reference) | - |
| Statin | 376 | 11356 | 33.11 | 0.38 | (0.34, 0.43) | <0.001 | 0.38 | (0.34, 0.43) | <0.001 |
| Aspirin | 661 | 6229 | 106.12 | 1.27 | (1.17, 1.38) | <0.001 | 0.85 | (0.78, 0.93) | <0.001 |
| Statin&Aspirin | 1509 | 22367 | 67.47 | 0.80 | (0.75, 0.85) | <0.001 | 0.56 | (0.52, 0.61) | <0.001 |
| **Gender** |  |  |  |  |  |  |  |  |  |
| Female | 1846 | 31770 | 58.11 | 1.00 | (reference) | - | 1.00 | (reference) | - |
| Male | 3669 | 43562 | 84.22 | 1.45 | (1.37, 1.54) | <0.001 | 1.45 | (1.37, 1.53) | <0.001 |
| **Age, years** |  |  |  |  |  |  |  |  |  |
| 18-50 | 778 | 16872 | 46.11 | 1.00 | (reference) | - | 1.00 | (reference) | - |
| 51-60 | 1204 | 21814 | 55.19 | 1.20 | (1.1, 1.31) | <0.001 | 1.22 | (1.11, 1.33) | <0.001 |
| >60 | 3533 | 36645 | 96.41 | 2.12 | (1.96, 2.29) | <0.001 | 2.03 | (1.86, 2.21) | <0.001 |
| **Comorbidities** |  |  |  |  |  |  |  |  |  |
| Cardiovascular disease | |  |  |  |  |  |  |  |  |
| No | 1921 | 30943 | 62.08 | 1.00 | (reference) | - | 1.00 | (reference) | - |
| Yes | 3594 | 44389 | 80.97 | 1.31 | (1.24, 1.39) | <0.001 | 1.01 | (0.94, 1.08) | 0.83 |
| Stroke |  |  |  |  |  |  |  |  |  |
| No | 4568 | 66835 | 68.35 | 1.00 | (reference) | - | 1.00 | (reference) | - |
| Yes | 947 | 8497 | 111.45 | 1.65 | (1.54, 1.77) | <0.001 | 1.29 | (1.19, 1.40) | <0.001 |
| Diabetes mellitus |  |  |  |  |  |  |  |  |  |
| No | 3272 | 48940 | 66.86 | 1.00 | (reference) | - | 1.00 | (reference) | - |
| Yes | 2243 | 26392 | 84.99 | 1.28 | (1.21, 1.35) | <0.001 | 1.12 | (1.05, 1.20) | <0.001 |
| Hyperlipidemia |  |  |  |  |  |  |  |  |  |
| No | 3253 | 38545 | 84.39 | 1.00 | (reference) | - | 1.00 | (reference) | - |
| Yes | 2262 | 36787 | 61.49 | 0.73 | (0.69, 0.77) | <0.001 | 0.58 | (0.55, 0.62) | <0.001 |
| Obesity |  |  |  |  |  |  |  |  |  |
| No | 5429 | 73603 | 73.76 | 1.00 | (reference) | - | 1.00 | (reference) | - |
| Yes | 86 | 1729 | 49.74 | 0.68 | (0.55, 0.84) | <0.001 | 0.79 | (0.64, 0.98) | 0.04 |
| Chronic kidney disease | |  |  |  |  |  |  |  |  |
| No | 5114 | 71817 | 71.21 | 1.00 | (reference) | - | 1.00 | (reference) | - |
| Yes | 401 | 3514 | 114.11 | 1.63 | (1.47, 1.81) | <0.001 | 1.25 | (1.12, 1.39) | <0.001 |
| Viral hepatitis |  |  |  |  |  |  |  |  |  |
| No | 4133 | 56980 | 72.53 | 1.00 | (reference) | - | 1.00 | (reference) | - |
| Yes | 1382 | 18352 | 75.31 | 1.04 | (0.98, 1.10) | 0.23 | 1.00 | (0.94, 1.06) | 0.97 |
| Metabolic syndrome | |  |  |  |  |  |  |  |  |
| No | 3926 | 56927 | 68.97 | 1.00 | (reference) | - | 1.00 | (reference) | - |
| Yes | 1589 | 18405 | 86.34 | 1.26 | (1.19, 1.34) | <0.001 | 1.22 | (1.10, 1.35) | <0.001 |
| **Medication** |  |  |  |  |  |  |  |  |  |
| H2 receptor antagonists | |  |  |  |  |  |  |  |  |
| No | 2903 | 40892 | 70.99 | 1.00 | (reference) | - | 1.00 | (reference) | - |
| Yes | 2612 | 34440 | 75.84 | 1.07 | (1.02, 1.13) | 0.01 | 0.99 | (0.94, 1.05) | 0.72 |
| Proton pump inhibitors | |  |  |  |  |  |  |  |  |
| No | 3875 | 55566 | 69.74 | 1.00 | (reference) | - | 1.00 | (reference) | - |
| Yes | 1640 | 19765 | 82.97 | 1.20 | (1.13, 1.27) | <0.001 | 1.11 | (1.04, 1.18) | <0.001 |

Abbreviations: HR, hazard ratio; CI, confidence interval; PY, person-years;

| Table S10. Baseline characteristics of patients with MAFLD/MASH in non-statin&aspirin, statin, aspirin, and statin&aspirin cohort (only matched sex, age, and index year). | | | | | | | | | |  |
| --- | --- | --- | --- | --- | --- | --- | --- | --- | --- | --- |
| Variables | Non-Statin&Aspirin | | Statin | | Aspirin | | Statin&Aspirin | | *p*-value | SMD |
| (n=6883) | | (n=1880) | | (n=1173) | | (n=3830) | |
| n | % | n | % | n | % | n | % |
| **Gender** |  |  |  |  |  |  |  |  |  |  |
| Female | 2694 | 39.14 | 856 | 45.53 | 398 | 33.93 | 1428 | 37.28 | <0.0001 | 0.13 |
| Male | 4189 | 60.86 | 1024 | 54.47 | 775 | 66.07 | 2402 | 62.72 |  |  |
| **Age, years** |  |  |  |  |  |  |  |  |  |  |
| 18-50 | 1300 | 18.89 | 618 | 32.87 | 148 | 12.62 | 523 | 13.66 | <0.0001 | 0.323 |
| 51-60 | 2350 | 34.14 | 735 | 39.1 | 316 | 26.94 | 1228 | 32.06 |  | 0.103 |
| >60 | 3233 | 46.97 | 527 | 28.03 | 709 | 60.44 | 2079 | 54.28 |  | 0.399 |
| **Comorbidities** |  |  |  |  |  |  |  |  |  |  |
| Cardiovascular disease | 3061 | 44.47 | 1020 | 54.26 | 1024 | 87.3 | 3295 | 86.03 | <0.0001 | 0.197 |
| Stroke | 377 | 5.48 | 80 | 4.26 | 285 | 24.3 | 859 | 22.43 | <0.0001 | 0.057 |
| Diabetes mellitus | 1567 | 22.77 | 838 | 44.57 | 444 | 37.85 | 2189 | 57.15 | <0.0001 | 0.474 |
| Hyperlipidemia | 1959 | 28.46 | 1263 | 67.18 | 447 | 38.11 | 3118 | 81.41 | <0.0001 | 0.841 |
| Obesity | 114 | 1.66 | 55 | 2.93 | 28 | 2.39 | 152 | 3.97 | <0.0001 | 0.085 |
| Chronic kidney disease | 245 | 3.56 | 52 | 2.77 | 84 | 7.16 | 357 | 9.32 | <0.0001 | 0.045 |
| Viral hepatitis | 2041 | 29.65 | 388 | 20.64 | 344 | 29.33 | 750 | 19.58 | <0.0001 | 0.209 |
| Metabolic syndrome | 659 | 9.57 | 404 | 21.49 | 356 | 30.35 | 2105 | 54.96 | <0.0001 | 0.333 |
| **Medication** |  |  |  |  |  |  |  |  |  |  |
| H2 receptor antagonists | 3126 | 45.42 | 716 | 38.09 | 665 | 56.69 | 2154 | 56.24 | <0.0001 | 0.149 |
| Proton pump inhibitors | 1929 | 28.03 | 398 | 21.17 | 384 | 32.74 | 1291 | 33.71 | <0.0001 | 0.16 |
|  | **mean** | **± SDa** | **mean** | **± SDa** | **mean** | **± SDa** | **mean** | **± SDa** | <0.0001 | 0.493 |
| **Age, years** | 60.57 | 11.65 | 55.09 | 10.56 | 64.7 | 12.42 | 62.13 | 10.96 | <0.0001 | 0.493 |
| **Follow-up time, years,** | **mean** | **± SDa** | **mean** | **± SDa** | **mean** | **± SDa** | **mean** | **± SDa** |  |  |
| Hepatocellular carcinoma | 4.20 | 2.78 | 6.33 | 3.13 | 4.34 | 2.78 | 4.88 | 2.84 | <0.0001 | 0.721 |
| Cirrhosis | 4.43 | 2.8 | 6.51 | 3.08 | 4.60 | 2.78 | 5.05 | 2.84 | <0.0001 | 0.706 |
| All-cause mortality | 4.46 | 2.8 | 6.52 | 3.08 | 4.61 | 2.78 | 5.06 | 2.84 | <0.0001 | 0.701 |

at-test; Chi-square test; SD: standard deviation.

Table S11. Incidences and hazard ratios of cirrhotic Outcomes. (Statin&Aspirin) (only matched sex, age, and index year)

| Variables | Cirrhotic | | | cHR | (95% CI) | *p*-value | aHR | (95% CI) | *p*-value |
| --- | --- | --- | --- | --- | --- | --- | --- | --- | --- |
| Event | PY | IR |
| **Exposure** |  |  |  |  |  |  |  |  |  |
| Non-Statin&Aspirin | 77 | 30479 | 2.53 | 1.00 | (reference) | - | 1.00 | (reference) | - |
| Statin | 7 | 12234 | 0.57 | 0.23 | (0.10, 0.50) | <0.001 | 0.24 | (0.11, 0.55) | <0.001 |
| Aspirin | 4 | 5400 | 0.74 | 0.29 | (0.11, 0.80) | 0.02 | 0.26 | (0.09, 0.73) | 0.01 |
| Statin&Aspirin | 8 | 19338 | 0.41 | 0.17 | (0.08, 0.35) | <0.001 | 0.15 | (0.07, 0.33) | <0.001 |
| **Gender** |  |  |  |  |  |  |  |  |  |
| Female | 29 | 27253 | 1.06 | 1.00 | (reference) | - | 1.00 | (reference) | - |
| Male | 67 | 40198 | 1.67 | 1.55 | (1.00, 2.39) | 0.05 | 1.48 | (0.95, 2.29) | 0.08 |
| **Age, years** |  |  |  |  |  |  |  |  |  |
| 18-50 | 26 | 15210 | 1.71 | 1.00 | (reference) | - | 1.00 | (reference) | - |
| 51-60 | 32 | 23731 | 1.35 | 0.76 | (0.46, 1.28) | 0.31 | 0.78 | (0.46, 1.33) | 0.37 |
| >60 | 38 | 28510 | 1.33 | 0.73 | (0.44, 1.20) | 0.22 | 0.74 | (0.44, 1.26) | 0.27 |
| **Comorbidities** |  |  |  |  |  |  |  |  |  |
| Cardiovascular disease | |  |  |  |  |  |  |  |  |
| No | 50 | 28156 | 1.78 | 1.00 | (reference) | - | 1.00 | (reference) | - |
| Yes | 46 | 39295 | 1.17 | 0.64 | (0.43, 0.96) | 0.03 | 0.61 | (0.38, 1.00) | 0.05 |
| Stroke |  |  |  |  |  |  |  |  |  |
| No | 88 | 60876 | 1.45 | 1.00 | (reference) | - | 1.00 | (reference) | - |
| Yes | 8 | 6574 | 1.22 | 0.81 | (0.39, 1.67) | 0.56 | 0.70 | (0.31, 1.57) | 0.39 |
| Diabetes mellitus |  |  |  |  |  |  |  |  |  |
| No | 58 | 43757 | 1.33 | 1.00 | (reference) | - | 1.00 | (reference) | - |
| Yes | 38 | 23694 | 1.60 | 1.20 | (0.79, 1.80) | 0.39 | 1.38 | (0.83, 2.27) | 0.21 |
| Hyperlipidemia |  |  |  |  |  |  |  |  |  |
| No | 68 | 33707 | 2.02 | 1.00 | (reference) | - | 1.00 | (reference) | - |
| Yes | 28 | 33744 | 0.83 | 0.41 | (0.27, 0.64) | <0.001 | 0.30 | (0.17, 0.53) | <0.001 |
| Obesity |  |  |  |  |  |  |  |  |  |
| No |  |  | 1.43 | 1.00 | (reference) | - | 1.00 | (reference) | - |
| Yes |  |  | 1.27 | 0.87 | (0.21, 3.52) | 0.84 | 0.70 | (0.17, 2.98) | 0.63 |
| Chronic kidney disease | |  |  |  |  |  |  |  |  |
| No |  |  | 1.45 | 1.00 | (reference) | - | 1.00 | (reference) | - |
| Yes |  |  | 0.72 | 0.46 | (0.11, 1.86) | 0.28 | 0.34 | (0.08, 1.45) | 0.14 |
| Viral hepatitis |  |  |  |  |  |  |  |  |  |
| No | 62 | 50848 | 1.22 | 1.00 | (reference) | - | 1.00 | (reference) | - |
| Yes | 34 | 16602 | 2.05 | 1.66 | (1.10, 2.53) | 0.02 | 1.53 | (1.01, 2.34) | 0.05 |
| Metabolic syndrome | |  |  |  |  |  |  |  |  |
| No | 76 | 52001 | 1.46 | 1.00 | (reference) | - | 1.00 | (reference) | - |
| Yes | 20 | 15449 | 1.29 | 0.85 | (0.52, 1.40) | 0.53 | 2.37 | (1.01, 5.52) | 0.05 |
| **Medication** |  |  |  |  |  |  |  |  |  |
| H2 receptor antagonists | |  |  |  |  |  |  |  |  |
| No | 47 | 37569 | 1.25 | 1.00 | (reference) | - | 1.00 | (reference) | - |
| Yes | 49 | 29882 | 1.64 | 1.27 | (0.84, 1.90) | 0.25 | 1.06 | (0.69, 1.65) | 0.78 |
| Proton pump inhibitors | |  |  |  |  |  |  |  |  |
| No | 53 | 50082 | 1.06 | 1.00 | (reference) | - | 1.00 | (reference) | - |
| Yes | 43 | 17369 | 2.48 | 2.28 | (1.52, 3.41) | <0.001 | 2.39 | (1.55, 3.69) | <0.001 |

Table S12. Incidences and hazard ratios of HCC Outcomes. (Statin&Aspirin) (only matched sex, age, and index year)

| Variables | Hepatocellular carcinoma | | | cHR | (95% CI) | *p*-value | aHR | (95% CI) | *p*-value |
| --- | --- | --- | --- | --- | --- | --- | --- | --- | --- |
| Event | PY | IR |
| **Exposure** |  |  |  |  |  |  |  |  |  |
| Non-Statin&Aspirin | 1272 | 28929 | 43.97 | 1.00 | (reference) | - | 1.00 | (reference) | - |
| Statin | 204 | 11910 | 17.13 | 0.37 | (0.32, 0.43) | <0.001 | 0.49 | (0.42, 0.58) | <0.001 |
| Aspirin | 229 | 5086 | 45.03 | 1.01 | (0.88, 1.16) | 0.88 | 0.82 | (0.71, 0.95) | 0.01 |
| Statin&Aspirin | 470 | 18699 | 25.14 | 0.57 | (0.51, 0.63) | <0.001 | 0.56 | (0.50, 0.64) | <0.001 |
| **Gender** |  |  |  |  |  |  |  |  |  |
| Female | 700 | 26291 | 26.63 | 1.00 | (reference) | - | 1.00 | (reference) | - |
| Male | 1475 | 38333 | 38.48 | 1.45 | (1.33, 1.59) | <0.001 | 1.47 | (1.34, 1.61) | <0.001 |
| **Age, years** |  |  |  |  |  |  |  |  |  |
| 18-50 | 265 | 14878 | 17.81 | 1.00 | (reference) | - | 1.00 | (reference) | - |
| 51-60 | 646 | 22866 | 28.25 | 1.61 | (1.40, 1.86) | <0.001 | 1.52 | (1.32, 1.76) | <0.001 |
| >60 | 1264 | 26880 | 47.02 | 2.73 | (2.39, 3.12) | <0.001 | 2.47 | (2.16, 2.84) | <0.001 |
| **Comorbidities** |  |  |  |  |  |  |  |  |  |
| Cardiovascular disease | |  |  |  |  |  |  |  |  |
| No | 836 | 26994 | 30.97 | 1.00 | (reference) | - | 1.00 | (reference) | - |
| Yes | 1339 | 37630 | 35.58 | 1.16 | (1.07, 1.27) | <0.001 | 0.95 | (0.86, 1.05) | 0.29 |
| Stroke |  |  |  |  |  |  |  |  |  |
| No | 1927 | 58298 | 33.05 | 1.00 | (reference) | - | 1.00 | (reference) | - |
| Yes | 248 | 6326 | 39.20 | 1.20 | (1.05, 1.37) | 0.01 | 0.93 | (0.80, 1.08) | 0.35 |
| Diabetes mellitus |  |  |  |  |  |  |  |  |  |
| No | 1207 | 42106 | 28.67 | 1.00 | (reference) | - | 1.00 | (reference) | - |
| Yes | 968 | 22518 | 42.99 | 1.51 | (1.39, 1.64) | <0.001 | 1.42 | (1.28, 1.57) | <0.001 |
| Hyperlipidemia |  |  |  |  |  |  |  |  |  |
| No | 1347 | 31838 | 42.31 | 1.00 | (reference) | - | 1.00 | (reference) | - |
| Yes | 828 | 32786 | 25.25 | 0.59 | (0.54, 0.65) | <0.001 | 0.53 | (0.48, 0.59) | <0.001 |
| Obesity |  |  |  |  |  |  |  |  |  |
| No | 2141 | 63074 | 33.94 | 1.00 | (reference) | - | 1.00 | (reference) | - |
| Yes | 34 | 1550 | 21.94 | 0.65 | (0.46, 0.91) | 0.01 | 0.77 | (0.55, 1.09) | 0.14 |
| Chronic kidney disease | |  |  |  |  |  |  |  |  |
| No | 2032 | 61990 | 32.78 | 1.00 | (reference) | - | 1.00 | (reference) | - |
| Yes | 143 | 2633 | 54.31 | 1.70 | (1.43, 2.01) | <0.001 | 1.22 | (1.01, 1.46) | 0.04 |
| Viral hepatitis |  |  |  |  |  |  |  |  |  |
| No | 919 | 49865 | 18.43 | 1.00 | (reference) | - | 1.00 | (reference) | - |
| Yes | 1256 | 14758 | 85.11 | 4.71 | (4.33, 5.13) | <0.001 | 4.47 | (4.11, 4.88) | <0.001 |
| Metabolic syndrome | |  |  |  |  |  |  |  |  |
| No | 1606 | 49743 | 32.29 | 1.00 | (reference) | - | 1.00 | (reference) | - |
| Yes | 569 | 14881 | 38.24 | 1.20 | (1.09, 1.32) | <0.001 | 1.43 | (1.21, 1.68) | <0.001 |
| **Medication** |  |  |  |  |  |  |  |  |  |
| H2 receptor antagonists | |  |  |  |  |  |  |  |  |
| No | 1080 | 36074 | 29.94 | 1.00 | (reference) | - | 1.00 | (reference) | - |
| Yes | 1095 | 28550 | 38.35 | 1.32 | (1.21, 1.43) | <0.001 | 1.15 | (1.05, 1.26) | 0.002 |
| Proton pump inhibitors | |  |  |  |  |  |  |  |  |
| No | 1552 | 47939 | 32.37 | 1.00 | (reference) | - | 1.00 | (reference) | - |
| Yes | 623 | 16685 | 37.34 | 1.18 | (1.07, 1.29) | <0.001 | 1.05 | (0.95, 1.16) | 0.37 |

Table S13. Incidences and hazard ratios of overall mortality Outcomes. (Statin&Aspirin) (only matched sex, age, and index year)

| Variables | All-cause mortality | | | cHR | (95% CI) | *p*-value | aHR | (95% CI) | *p*-value |
| --- | --- | --- | --- | --- | --- | --- | --- | --- | --- |
| Event | PY | IR |
| **Exposure** |  |  |  |  |  |  |  |  |  |
| Non-Statin&Aspirin | 2768 | 30671 | 90.25 | 1.00 | (reference) | - | 1.00 | (reference) | - |
| Statin | 385 | 12255 | 31.42 | 0.34 | (0.30, 0.38) | <0.001 | 0.39 | (0.35, 0.44) | <0.001 |
| Aspirin | 490 | 5405 | 90.66 | 1.00 | (0.91, 1.10) | 0.97 | 0.78 | (0.71, 0.87) | <0.001 |
| Statin&Aspirin | 1119 | 19362 | 57.79 | 0.63 | (0.59, 0.68) | <0.001 | 0.54 | (0.50, 0.59) | <0.001 |
| **Gender** |  |  |  |  |  |  |  |  |  |
| Female | 1527 | 27335 | 55.86 | 1.00 | (reference) | - | 1.00 | (reference) | - |
| Male | 3235 | 40358 | 80.16 | 1.44 | (1.35, 1.53) | <0.001 | 1.45 | (1.37, 1.55) | <0.001 |
| **Age, years** |  |  |  |  |  |  |  |  |  |
| 18-50 | 683 | 15284 | 44.69 | 1.00 | (reference) | - | 1.00 | (reference) | - |
| 51-60 | 1284 | 23837 | 53.87 | 1.21 | (1.11, 1.33) | <0.001 | 1.21 | (1.11, 1.33) | <0.001 |
| >60 | 2795 | 28572 | 97.82 | 2.23 | (2.05, 2.43) | <0.001 | 2.11 | (1.93, 2.30) | <0.001 |
| **Comorbidities** |  |  |  |  |  |  |  |  |  |
| Cardiovascular disease | |  |  |  |  |  |  |  |  |
| No | 1774 | 28313 | 62.66 | 1.00 | (reference) | - | 1.00 | (reference) | - |
| Yes | 2988 | 39380 | 75.88 | 1.22 | (1.15, 1.29) | <0.001 | 0.99 | (0.93, 1.06) | 0.82 |
| Stroke |  |  |  |  |  |  |  |  |  |
| No | 4066 | 61107 | 66.54 | 1.00 | (reference) | - | 1.00 | (reference) | - |
| Yes | 696 | 6586 | 105.68 | 1.60 | (1.48, 1.74) | <0.001 | 1.29 | (1.17, 1.41) | <0.001 |
| Diabetes mellitus |  |  |  |  |  |  |  |  |  |
| No | 2902 | 43914 | 66.08 | 1.00 | (reference) | - | 1.00 | (reference) | - |
| Yes | 1860 | 23779 | 78.22 | 1.19 | (1.12, 1.26) | <0.001 | 1.11 | (1.03, 1.19) | 0.01 |
| Hyperlipidemia |  |  |  |  |  |  |  |  |  |
| No | 2905 | 33884 | 85.73 | 1.00 | (reference) | - | 1.00 | (reference) | - |
| Yes | 1857 | 33809 | 54.93 | 0.64 | (0.6, 0.68) | <0.001 | 0.55 | (0.52, 0.59) | <0.001 |
| Obesity |  |  |  |  |  |  |  |  |  |
| No | 4689 | 66104 | 70.93 | 1.00 | (reference) | - | 1.00 | (reference) | - |
| Yes | 73 | 1588 | 45.97 | 0.65 | (0.52, 0.82) | <0.001 | 0.77 | (0.61, 0.97) | 0.03 |
| Chronic kidney disease | |  |  |  |  |  |  |  |  |
| No | 4458 | 64912 | 68.68 | 1.00 | (reference) | - | 1.00 | (reference) | - |
| Yes | 304 | 2781 | 109.31 | 1.61 | (1.44, 1.81) | <0.001 | 1.26 | (1.12, 1.43) | <0.001 |
| Viral hepatitis |  |  |  |  |  |  |  |  |  |
| No | 3540 | 51010 | 69.4 | 1.00 | (reference) | - | 1.00 | (reference) | - |
| Yes | 1222 | 16683 | 73.25 | 1.06 | (0.99, 1.13) | 0.10 | 0.99 | (0.93, 1.06) | 0.82 |
| Metabolic syndrome | |  |  |  |  |  |  |  |  |
| No | 3549 | 52200 | 67.99 | 1.00 | (reference) | - | 1.00 | (reference) | - |
| Yes | 1213 | 15493 | 78.29 | 1.16 | (1.08, 1.24) | <0.001 | 1.26 | (1.13, 1.41) | <0.001 |
| **Medication** |  |  |  |  |  |  |  |  |  |
| H2 receptor antagonists | |  |  |  |  |  |  |  |  |
| No | 2610 | 37689 | 69.25 | 1.00 | (reference) | - | 1.00 | (reference) | - |
| Yes | 2152 | 30004 | 71.72 | 1.04 | (0.98, 1.10) | 0.19 | 0.97 | (0.91, 1.03) | 0.30 |
| Proton pump inhibitors | |  |  |  |  |  |  |  |  |
| No | 3398 | 50203 | 67.69 | 1.00 | (reference) | - | 1.00 | (reference) | - |
| Yes | 1364 | 17489 | 77.99 | 1.16 | (1.09, 1.23) | <0.001 | 1.09 | (1.02, 1.17) | 0.01 |

Abbreviations: HR, hazard ratio; CI, confidence interval; PY, person-years;


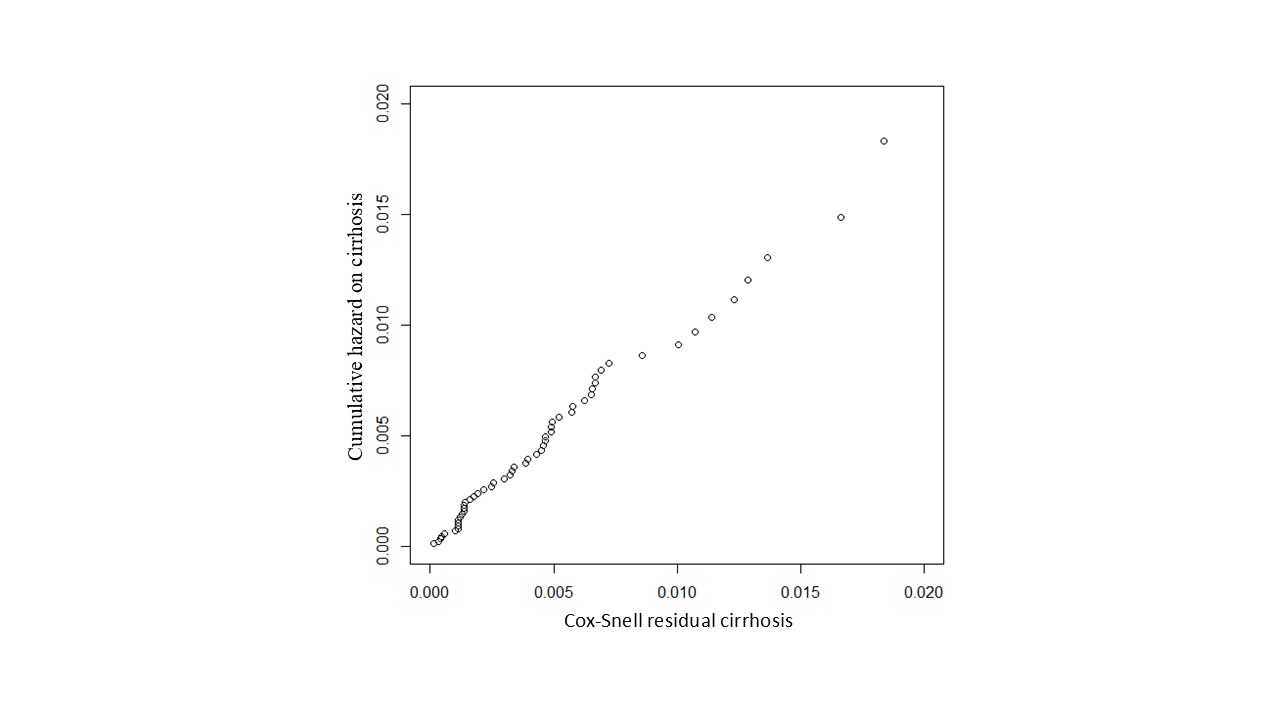


Figure S1. A plot of the estimated cumulative hazard function against these residuals that closely follows a 45-degree line indicates that the Cox model satisfies the proportional hazards (PH) assumption for cirrhosis.


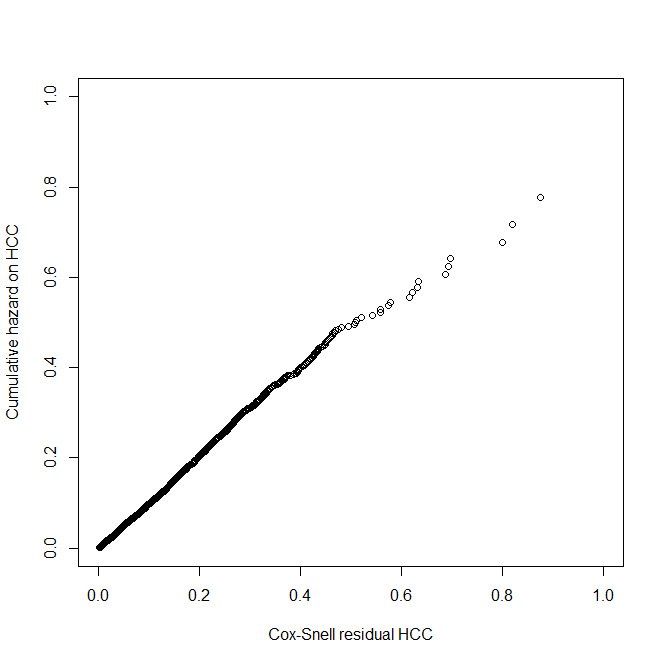


Figure S2 A plot of the estimated cumulative hazard function against these residuals that closely follows a 45-degree line indicates that the Cox model satisfies the proportional hazards (PH) assumption for HCC.


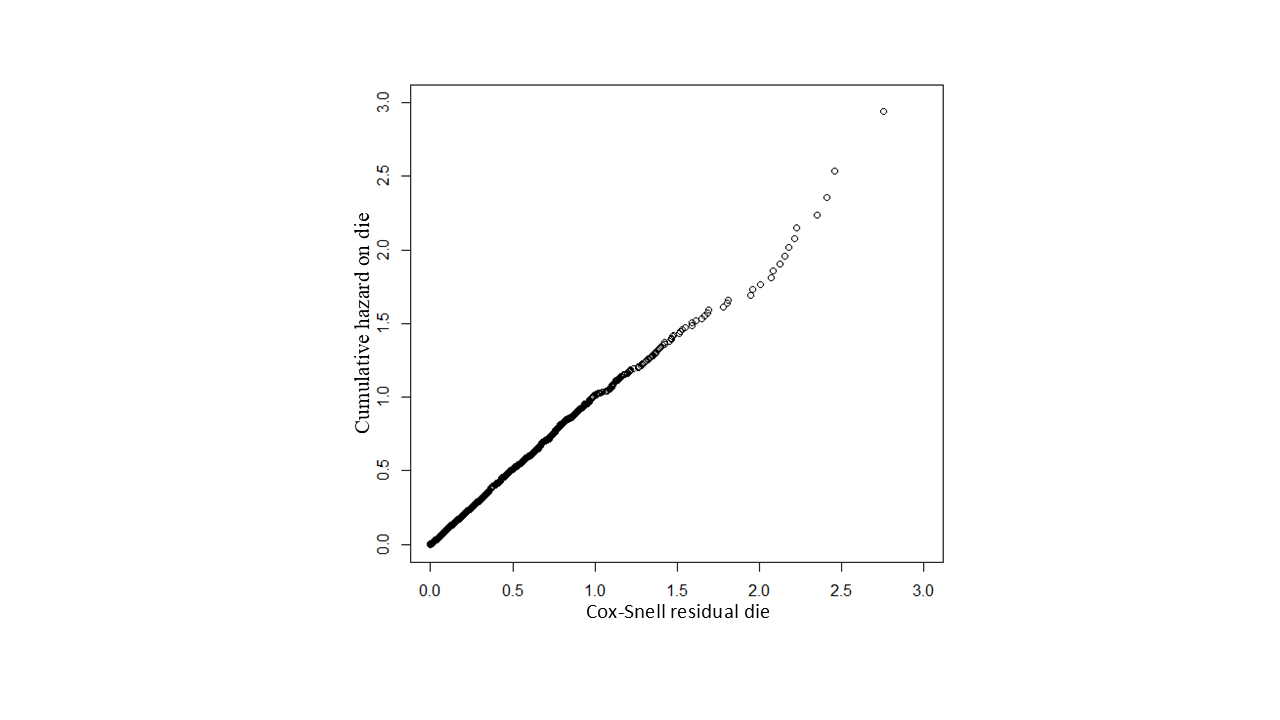


Figure S3. A plot of the estimated cumulative hazard function against these residuals that closely follows a 45-degree line indicates that the Cox model satisfies the proportional hazards (PH) assumption for overall mortality.
